# Supplementary material
Source: PubMed Central journal article supplement (PMC2875812)
Supplement: en.2009-1225_1.pdf [file en.2009-1225_1.pdf]

# Supplemental Figure 1

Co-localization of steroid receptors and ki67.

UL xenografts were treated with E2+P4 for 2 weeks (Fig.4A). DAPI (blue), Ki67 (red) and ERa (upper panels) or PR (lower panels). Ki67 positive cells (arrows) are also positive for ERa and PR. Images were taken under a 40x objective lens.

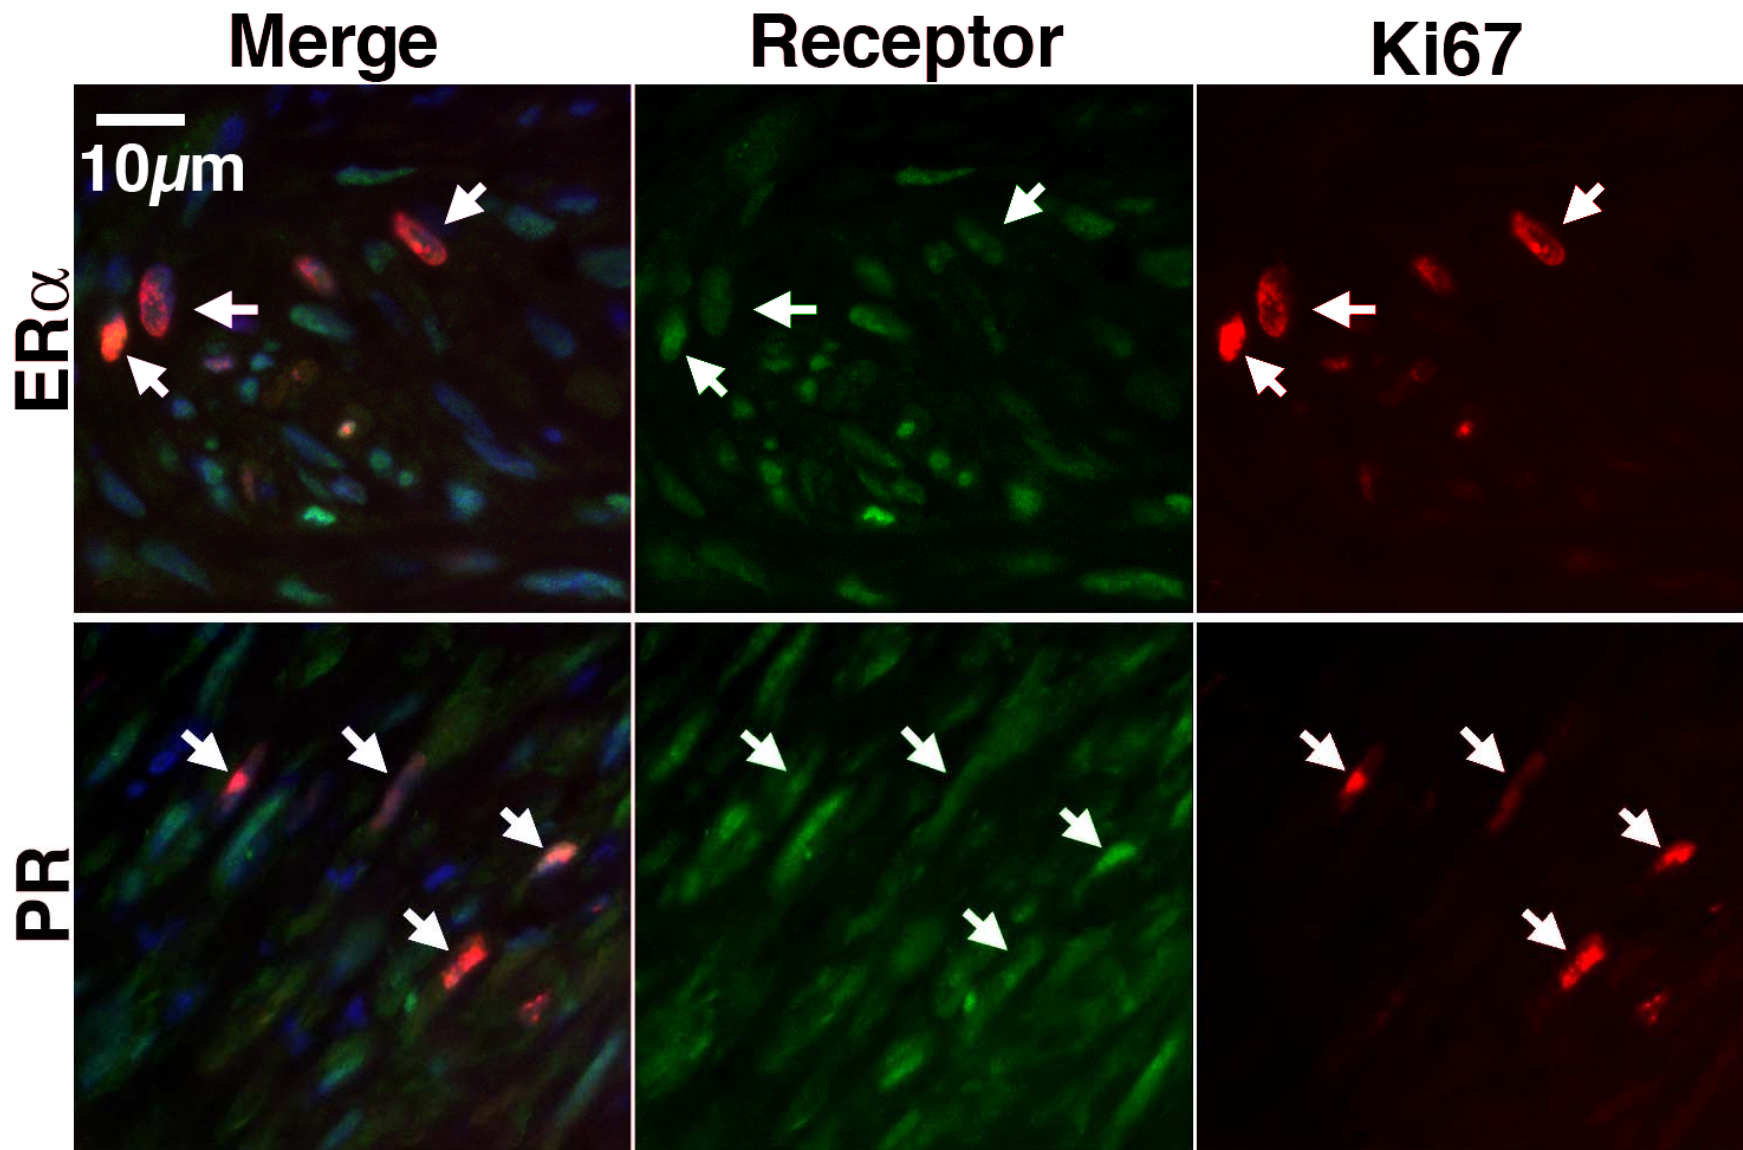

Supplemental Figure 1
